# Supplementary material
Source: Springer Nature journal article supplement (https://www.springermedizin.de/resource/supplementary/13012_2012_575_MOESM5_ESM.pdf/9630474)

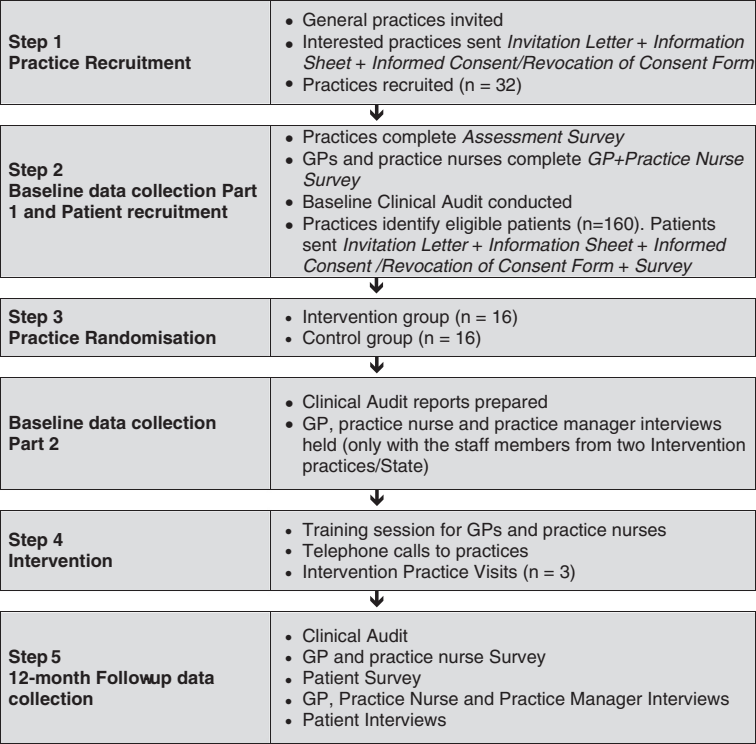

Supplement: MOESM5 [file 9630474]
